# Supplementary material for: Atom-economical synthesis of ZnO@ZIF-8 core–shell heterostructure by dry gel conversion (DGC) method for enhanced H2 sensing selectivity
Source: Royal Society of Chemistry journal article supplement (doi:10.1039/c9tc06530j), 2020-01-01
Supplement: c9tc06530j1.pdf [file c9tc06530j1.pdf]

**Atom-Economical Synthesis of ZnO@ZIF-8 Core-Shell  
Heterostructure by Dry Gel Conversion (DGC) Method for  
Enhanced H<sub>2</sub> Sensing Selectivity**

Peng Ji,<sup>a,c,†</sup> Xuefeng Hu,<sup>b,†</sup> Renbing Tian,<sup>a</sup> Hua Zheng,<sup>a</sup> Jinghua Sun,<sup>a</sup> Wei Zhang<sup>b,\*</sup>,  
Junbiao Peng,<sup>c,\*</sup>

<sup>a</sup> School of Electrical Engineering & Intelligentization, Dongguan University of Technology, No. 1 Daxue Road, Dongguan 523808, PR China

<sup>b</sup> School of Instrument Science and Opto-Electronics Engineering, Research Center for Sensor Science and Technology and Special Display and Imaging Technology Innovation Center of Anhui Province, Hefei University of Technology, No. 193 Tunxi Road, Hefei 230009, PR China

<sup>c</sup> State Key Laboratory of Luminescent Materials and Devices, South China University of Technology, No. 381 Wushan Road, Guangzhou 510640, PR China

<sup>†</sup>Co-first author.

\*Corresponding author.

E-mail address: zhangw@hfut.edu.cn (W. Zhang), psjbpeng@scut.edu.cn (J. Peng)

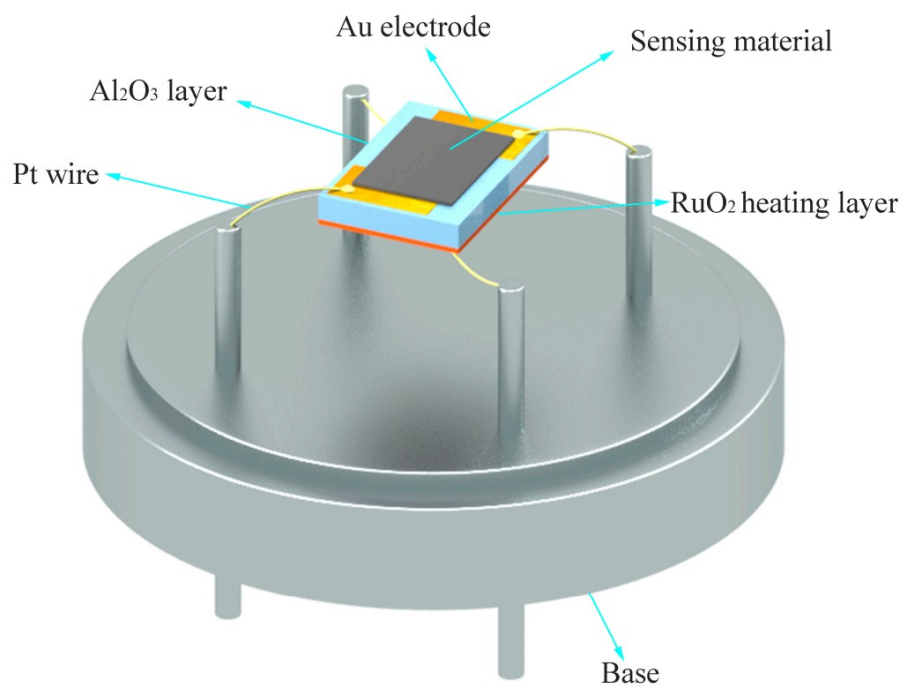

Fig. S1 Schematic diagram of the packaged gas sensor.

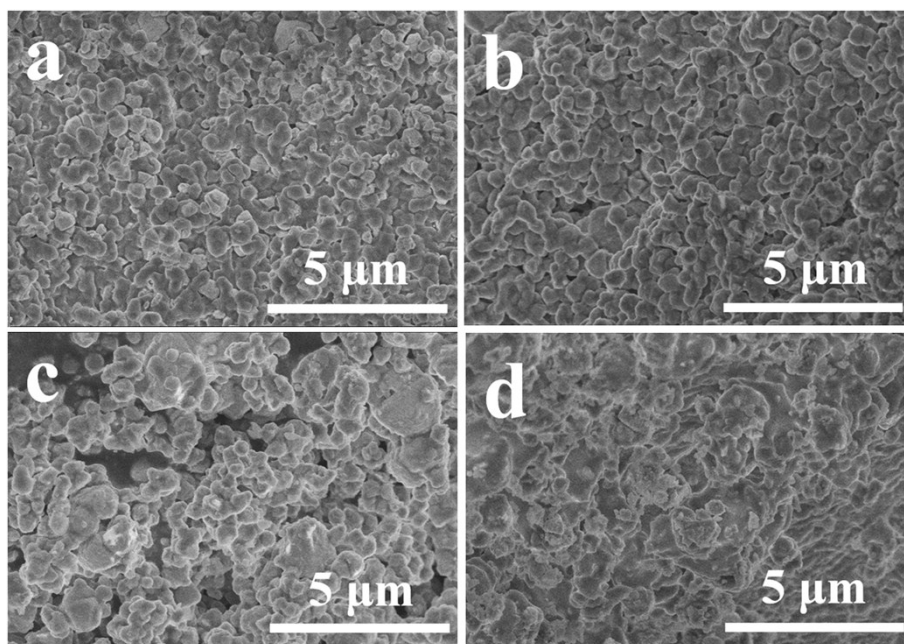

Fig. S2 SEM images of the ZnO@ZIF-8 samples as-synthesized at initial MeIM/ZnO ratio of 0.2 (a), 0.3 (b), 0.4 (c) and 0.75 (d).

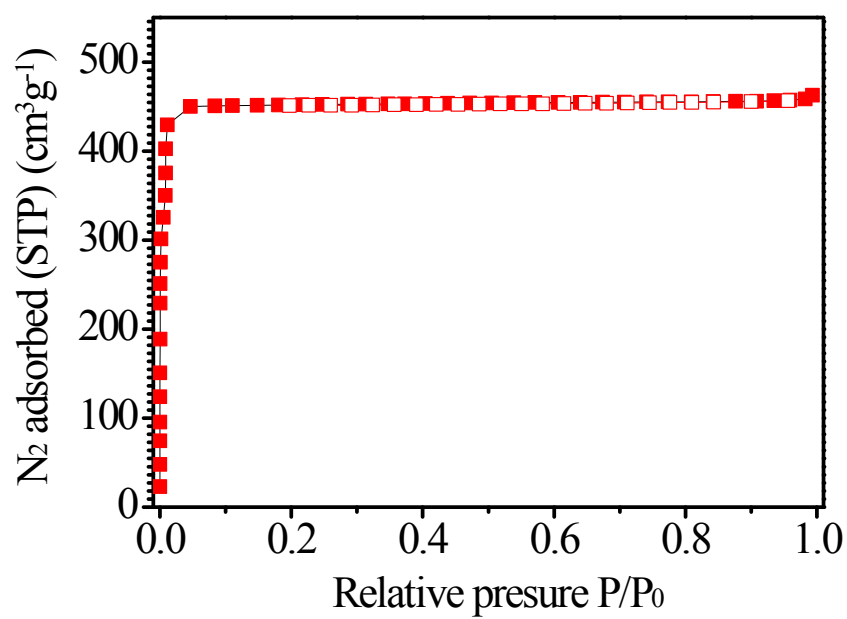

Fig. S3 N<sub>2</sub> sorption isotherms of as-synthesized ZIF-8.

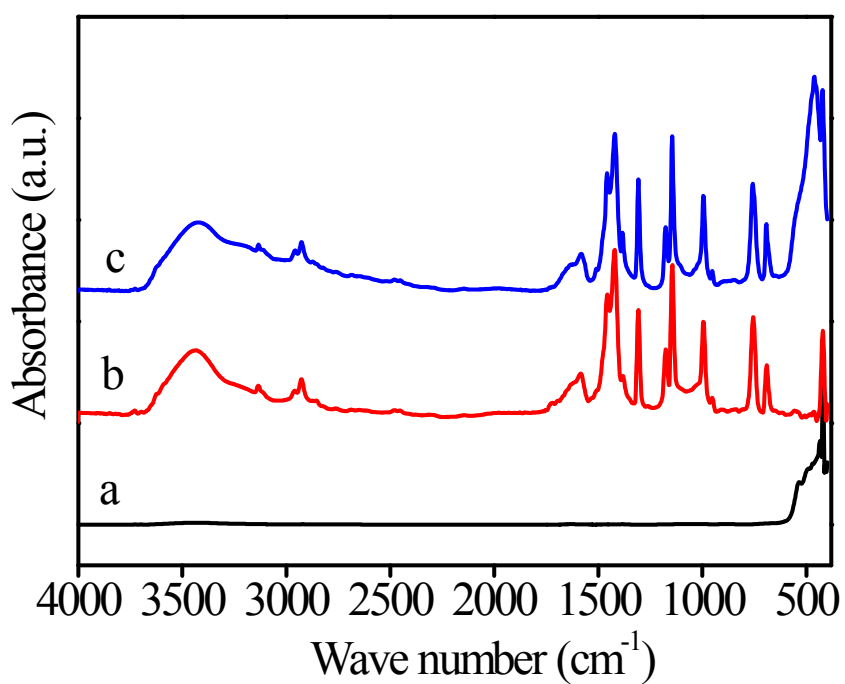

Fig. S4 FT-IR spectras of ZnO (a), ZnO@ZIF-8 (b) and ZIF-8 (d).

ZnO@ZIF-8 was synthesized with initial MeIM/ZnO ratio of 0.2.

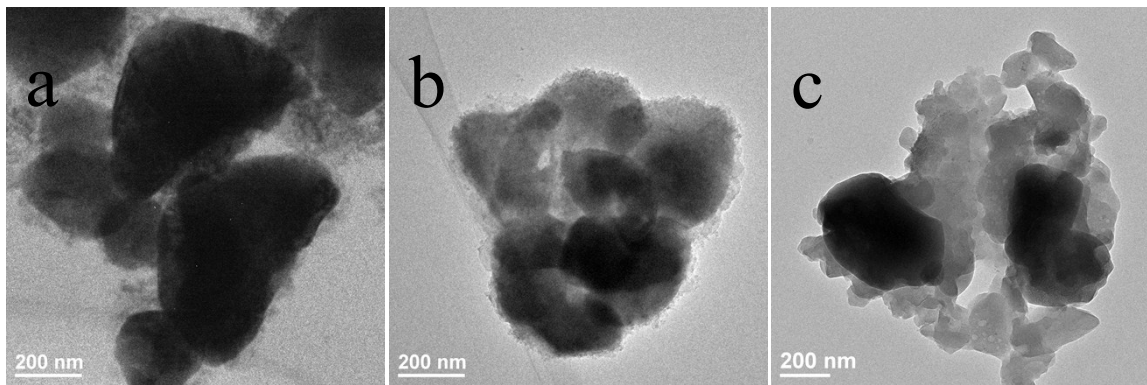

Fig. S5 TEM images of ZnO@ZIF-8-0.2 (a), ZnO@ZIF-8-0.4 (b) and ZnO@ZIF-8-0.75 (c).

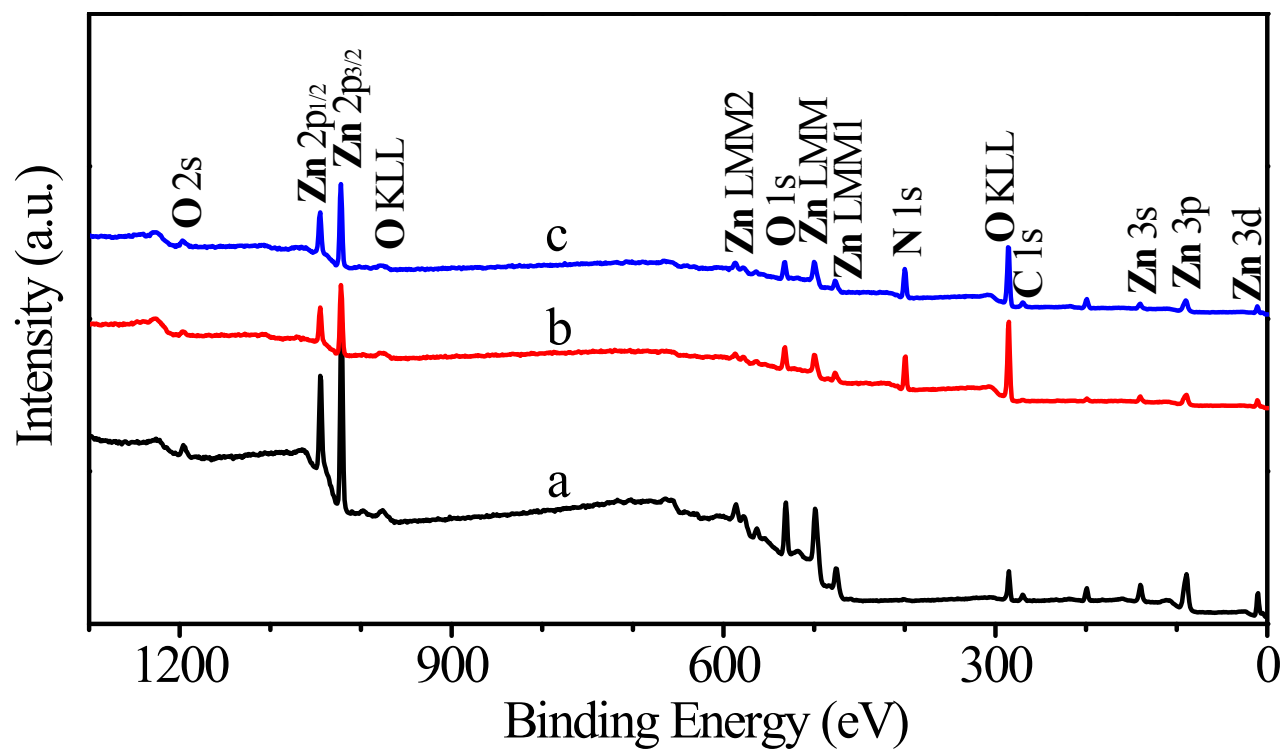

Fig. S6 XPS spectra of ZnO (a), ZIF-8 (b) and ZnO@ZIF-8 (c). ZnO@ZIF-8 was referred to ZnO@ZIF-8-0.2.
